# Supplementary material
Source: MDPI journal article supplement (https://www.mdpi.com/1422-0067/24/17/13660)
Supplement: s1 [file s1]

Archive with 3 entries (3 files):
- Figure S1.pdf
- Figure S2.pdf
- Figure S3.pdf
