# Supplementary material for: Inhibition of Notch Signaling Enhances Antitumor Activity of Histone Deacetylase Inhibitor LAQ824
Source: MDPI journal article supplement (doi:10.3390/ijms241713660), 2023-09-04
Supplement: s1 [file s1 › Figure S3.pdf]

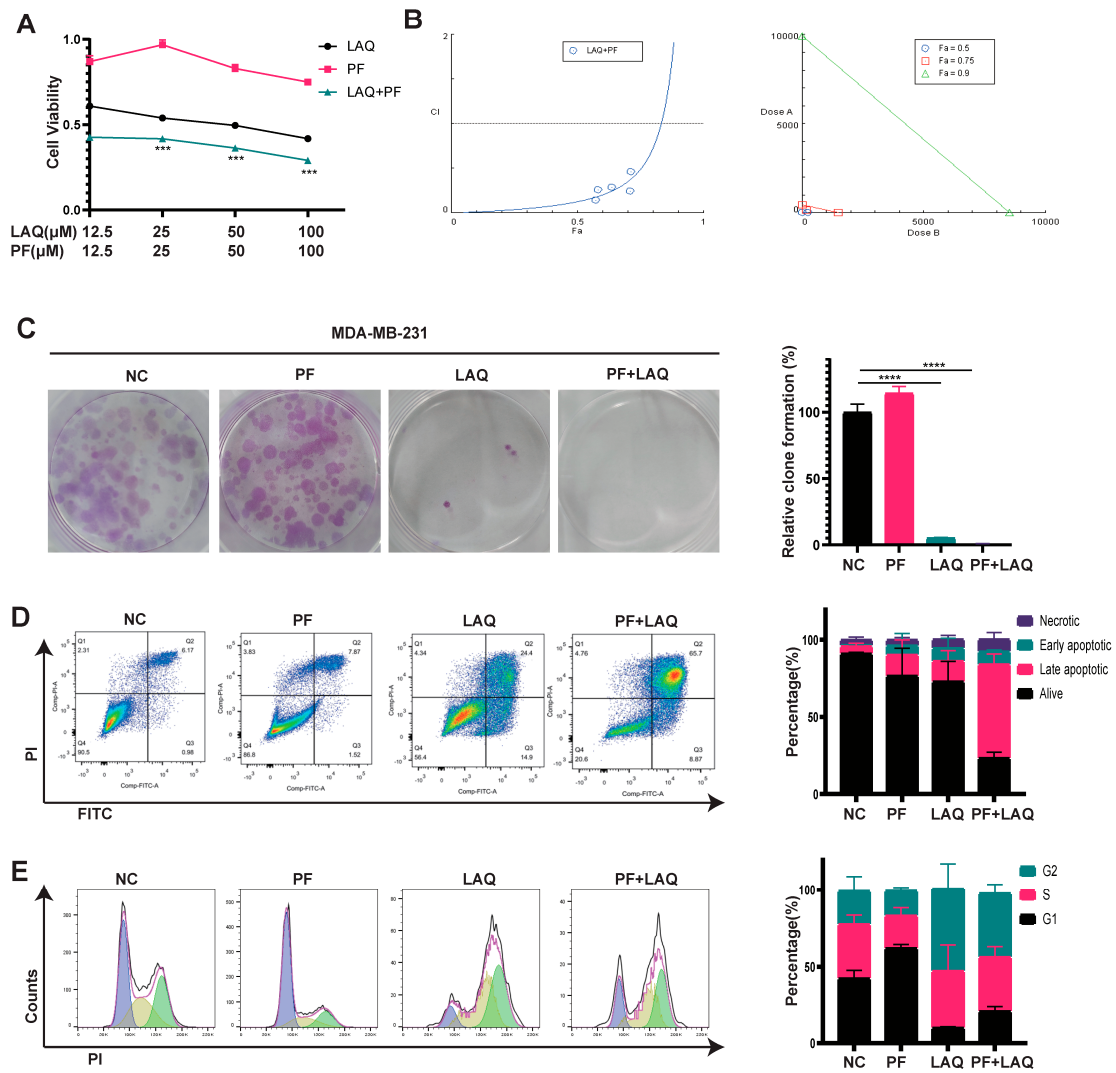

**Figure S3.** Combined treatment of LAQ and PF03084014 synergistically reduced cell proliferation in MDA-MB-231 cell line (A) MTT assay detects proliferation ability of MDA-MB-231 cell lines after 48 hours of treatments with LAQ and PF; (B) CI were assessed by Compusy after treatment with LAQ and PF for 48 hours; (C) Colony formation assay detects long proliferation of HCT116 cell treatment with range dose of LAQ; (D) Apoptosis (annexin V+/DAPI- plus annexin V+/DAPI+) of MDA-MB-231 cell line treated with LAQ and PF was detected by flow cytometry; (E) MDA-MB-231 cell line were treated with LAQ and PF for 24 h, then fixed, stained with PI, and analyzed by flow cytometry. The data are expressed as the mean  $\pm$  SD. Significant differences were analyzed using the unpaired two-tailed *t*-test. \*\*\*  $p < 0.001$ , \*\*\*\*  $p < 0.0001$ .  $n = 3$ .
